# Supplementary material for: Mechanistic conformational and substrate selectivity profiles emerging in the evolution of enzymes via parallel trajectories
Source: PubMed Central journal article supplement — Nat Commun. 2024 Aug 16;15:7068. doi: 10.1038/s41467-024-51133-y (PMC11329768; doi:10.1038/s41467-024-51133-y), 2024-08-16
Supplement: 41467_2024_51133_MOESM1_ESM.pdf [file 41467_2024_51133_MOESM1_ESM.pdf]

**Supplementary Information for:**

**Mechanistic conformational and substrate selectivity profiles emerging in the evolution of enzymes via parallel trajectories.**

**Christos S. Karamitros<sup>1</sup>, Kyle Murray<sup>2</sup>, Yoichi Kumada<sup>3</sup>, Kenneth A. Johnson<sup>4</sup>, Sheena D'Arcy<sup>2</sup>, George Georgiou<sup>1,4,5,6</sup>**

**<sup>1</sup>Department of Chemical Engineering, University of Texas at Austin (UT Austin), Austin, Texas, USA**

**<sup>2</sup>Department of Chemistry and Biochemistry, The University of Texas at Dallas, Richardson, Texas, USA**

**<sup>3</sup>Department of Molecular Chemistry and Engineering, Kyoto Institute of Technology, Kyoto, Japan**

**<sup>4</sup>Department of Molecular Biosciences, University of Texas at Austin (UT Austin), Austin, Texas, USA**

**<sup>5</sup>Department of Biomedical Engineering, University of Texas at Austin (UT Austin), Austin, TX, USA.**

**<sup>6</sup>Institute for Cellular and Molecular Biology, The University of Texas at Austin (UT Austin), Austin, Texas, USA**

Correspondence should be sent to: George Georgiou: [gg@che.utexas.edu](mailto:gg@che.utexas.edu)

**Supplementary Information includes:**

**Supplementary Figures 1-10**

**Supplementary Tables 1-11**

```

HsKYNase/1-460      1 LE LP AD TV QR IAAE LK CHPT DERV AL HL DE EDKL RH F R E C F Y I P K I QDL P PVD L SLVNKD ENAI Y F L G N L G L Q P R M V K T Y L E E E L D K W A K I A A Y G H P V ----- G K R P W I T G D E S I V G L M K D I V G A N E K E I 126
HsKYNase_46/1-460 1 LE LP AD TV QR IAAE LK CHPT DERV AL HL DE EDKL RH F R E C F Y I P K I QDL P PVD L SLVNKD ENAI Y F N G N S L G L Q P R M V K T Y L E E E L D K W A K I A A Y G H P V ----- G K R P W I T G D E S I V G L M K D I V G A N E K E I 126
HsKYNase_66/1-460 1 LE LP AD TV QR IAAE LK CHPT DERV AL HL DE EDKL RH F R E C F Y I P K I QDL P PVD L SLVNKD ENAI Y F N G N S L G L Q P R M V K T Y L E E E L D K W A K I A A Y G H P V ----- G D S P W I H Y D E S I V G L M K D I V G A N E K E I 126
HsKYNase_93D9/1-460 1 LE LP AD TV QR IAAE LK CHPT DERV AL HL DE EDKL RH F R E C F Y I P K I QDL P PVD L SLVNKD ENAI Y F N G N S L G L Q P R M V K T Y L E E E L D K W A K I A A Y G H P V ----- T K R P W T T T D E S I V G L M K D I V G A N E K E I 126
MpKYNase/1-428     1 ----- M N Y Q N T L A F A R E L D E Q D N L A G F N E F I I P Q H ----- H G R D M I T Y L C G N L G L Q P R A T A G V Y A E Q L S N W G S L A V E G W F E ----- G D S P W M H Y H R K L T E P L A I V G A L N T E V I 99
ScKYNase/1-453     1 ----- M E K L E L D G E - Y P E S L D E F N I T F K S ----- M G L S S D D K P V Y L C G N L G L M P R S T R N S I N A E L D A S D C A R V E S I E K H P E E A R G K V P W V S I D L P I L P L A P I V G A Q E N E V I 105

HsKYNase/1-460      127 A L M M A L T V N L H L M L S F F K P P K R Y K I L L E A K A F P S D H V A I E S S L Q L H G L N I I E E S M R M I K P R E G E E T L R I E D I L E V I E K E G S I A V I L F S G V H Y T G D H F N I P A I K A G Q A - K G C Y V G F D L A H A V G N V E L Y 256
HsKYNase_46/1-460 127 A L M M A L T V N L H L M L S F F K P P K R Y K I L L E A K A F P S D H V A I E S S L Q L H G L N I I E E S M R I I K P R E G E E T L R I E D I L E V I E K E G S I A V I L F S G V H Y T G D H F N I P A I K A G Q A - K G C Y V G F D L A H A V G N V E L Y 256
HsKYNase_66/1-460 127 V L M T L T V N L H L M L S F F K P P K R Y K I L L E A K A F P S D H V A I E S S L Q L H G L N I I E E S M R I I K P R E G E E T L R I E D I L E V I E K E G S I A V I L F S G I H Y T G D H F N I P A I K A G Q A - K G C Y V G F D L A H A V G N V E L Y 256
HsKYNase_93D9/1-460 127 A L M M A L T V N L H L M L S F F K P P K R Y K I L L E A K A F P S D H V A I E S S L Q L H G L N I I E E S L R I I N P R E G E T L R T E D I L E V I E K E G S I A V I L F S G V H Y T G D H F N I P A I K A G Q A - K G C Y V G F D L A H A V G N V E L Y 256
MpKYNase/1-428     100 V A M T L T V N L H L F L V S F Y R P I A K Y K I L M E G G A F P S D Q V A I E S S V H F H G Y Q - P O D A I I E V F P R A G E D T L R T E D I I R T I I H D H A D L A L V L F G G I N Y T G R F Y D L E Q I Q A A H Q - V G A Y A G F D L A H A A G N V P L Q 229
ScKYNase/1-453     106 A V M S L I A L N L S L L I T E Y K P E R F K L F K G S F P S D Y A F Y N C K I R G I S E P E N V F I Q I E P R E G E T Y I T O D I L D T I E V N O E L A L V C L S G V Q I T G R Y E D I G R I S F A H Q F P D I L V G W D L A H A V G N V P L Q 237

HsKYNase/1-460      257 L H D W G V D F A C W C G Y X L N A G A G G I A G A F I H E R H A H T ----- I - K P A L V G W Y G H E L S T R E K M D N K L Q L I P G V C G F R I N P P I L L V C S L H A S L E I F K Q A - T M K A L R K K S V L L T G L E Y L I K H N Y G K D K - - A A T - K 379
HsKYNase_46/1-460 257 L H D W G V D F A C W C G Y X L N A G A G G I A G A F I H E R H A H T ----- I - K P A L V G W Y G H E L S T R E K M D N K L Q L I P G V C G F R V N P P I L L V C S L H A S L E I F K Q A - T M K A L R K K S V L L T G L E Y L I K H N Y G K D K - - A A T - K 379
HsKYNase_66/1-460 257 L H D W G V D F A C W C G Y X L N S P G G I A G A F I H E R H A H T ----- I - K P A L V G W Y G H E L S T R E K M D N K L Q L I P G V C G F R C T P P I L L V C I L H A S L E I F K Q A - T M K A L R K K S V L L T G L E Y L I K H N Y G K D K - - A A T - K 379
HsKYNase_93D9/1-460 257 L H D W G V D F A C W C G Y X L N S P G G I A G A F I H E R H A H T ----- I - K P A L V G W Y G H E L S T R E K M D N K L Q L I P G V C G F R I N P P I L L V C S L H A S L E I F K Q A - T M K A L R K K S V L L T G L E Y L I K H N Y G K D K - - A A T - K 379
MpKYNase/1-428     230 L H H W G V D F A C W C G Y X Y M S S P G G I S G A F I H E R H F G N ----- K E L N R F A G W Y G R E D K E F E M K P G F K P Q E G A E G W Q V C S P L L L M A A H K A L N V F E K A G Y I E P L R K K S L L T G L E Y L I E G I N - - - - - T A H - Q 350
ScKYNase/1-453     238 L H D W G V D F A C W C G Y X L N A G A G G I G G L F Y H S K I T K P D P A K E S L P R L A G W S N D P A K E F O M L E V F E P I P G A L G F R Q L N P S V I E D T V A L R S L E L E A K F N G I N E V R K R L L L N I M T E L L E A S Y K Y H P L R I E K L 369

HsKYNase/1-460      380 K P V V N I I T P S - H V E E R G C L L T I T F S V P N ----- K D V F Q E L E K R G V V C D K N P N G I R V A R V P L Y N S F H D V Y K F T N L L T S I L D S A E T K N 460
HsKYNase_46/1-460 380 K P V V N I I T P S - H V E E R G C L L T I T F N V P N ----- K D V F Q E L E K R G V V C D K N P N G I R V A R V P L Y N S F H D V Y K F T N L L T S I L D S A E T K N 460
HsKYNase_66/1-460 380 K P V V N I I T P S - H V E E R G C L L T I T F N V P N ----- K D V F Q E L E K R G V V C D K N P N G I R V A R V P L Y N S F H D V Y K F T N L L T S I L D S A E T K N 460
HsKYNase_93D9/1-460 380 K P V V N I I T P S - H V E E R G C L L T I T F S V P N ----- K D V F Q E L E K R G V V C D K N P N G I R V A R V P L Y N S F H D V Y K F T N L L T S I L D S A E T K N 460
MpKYNase/1-428     351 K Q L F K I I T P K - N E N E R G C D L S I V C D I N G ----- K A I F D Q L V E G V L G D W E R D V I L S P I L P L Y S F E V Y L A G K L L A G V T Q F A E - 428
ScKYNase/1-453     370 P C F F T I L T P T S D E H G A L S L Y F D S D T G K E D I M P K V E Q Y L H D H G V I G D A R R R V R L A R A P L Y N T F S D Y I I A V N A I N E A M D L - - - - - 453

```

**Supplementary Figure 1. Amino acid sequence alignment of HsKYNase, HsKYNase\_46, HsKYNase\_66, HsKYNase\_93D9, MpKYNase and ScKYNase.** The blue rectangular frame indicated by the arrow shows the amino acid substitution shared by HsKYNase\_46 and ScKYNase. The red rectangular frames indicate residues that are shared by the eukaryotic OH-KYN-preferred ScKYNase and the prokaryotic KYN-preferred *Mucilaginibacter paludis* KYNase (MpKYNase). Asterisks denote the five mutations of HsKYNase\_93D9 that are found in ScKYNase and MpKYNase. The alignment was performed using the CLUSTALW algorithm of the Snappgene program (Version 6.05) and the coloring of the residues is based on their properties as per CLUSTALW (conservation cutoff for the coloring was set at >80%). The alignment file was exported as FASTA and the final figure shown here was prepared by JalView.

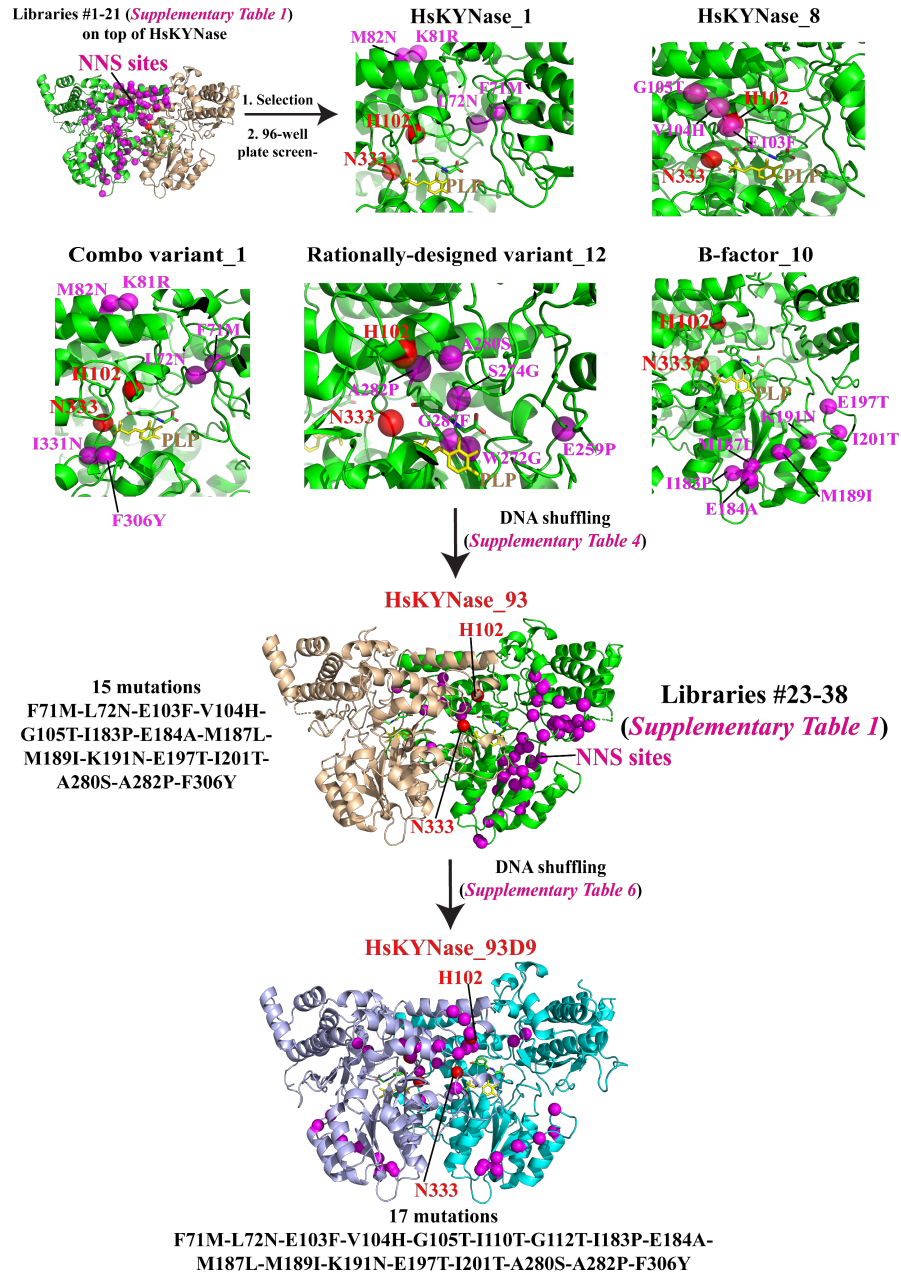

**Supplementary Figure 2. Detailed workflow of the evolutionary trajectory leading to the identification of HsKYNase\_93D9.** Fully randomized (NNS) amino acid residues of HsKYNase and HsKYNase\_93 are shown as magenta spheres. For simplicity, the targeted residues of only one of the monomers are shown. Mutations in evolutionary intermediates, namely HsKYNase\_1, HsKYNase\_8, Combo variant\_1, rationally designed variant\_12 and B-factor\_10 found in HsKYNase\_93 (*Supplementary Table 4*) are shown in green cartoon representations. Further NNS randomization on HsKYNase\_93 sites and DNA shuffling of variants (*Supplementary Table 6*) led to the identification of HsKYNase\_93D9 which harbors seventeen amino acid substitutions. The two monomers in HsKYNase\_93D9 harboring 17 mutations are shown in cyan light and in dark blue respectively and the mutations (on both monomers) are depicted as magenta spheres. The two monomers of HsKYNase\_93 are shown in wheat and green color respectively.

**a**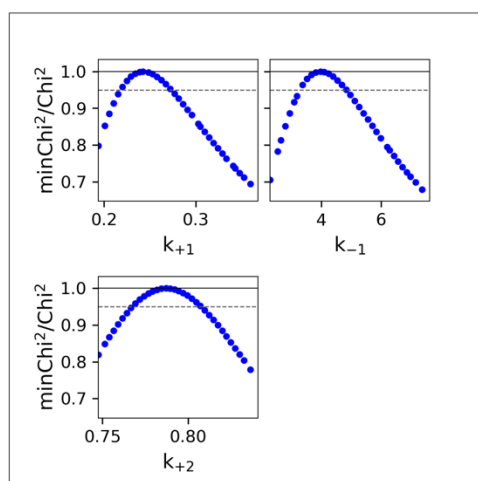**b**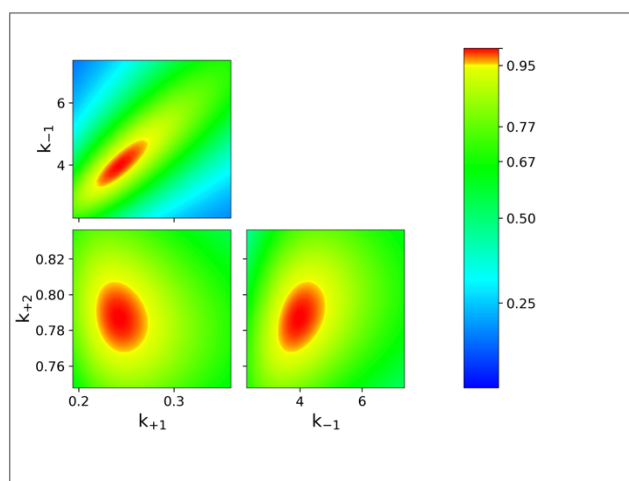**c**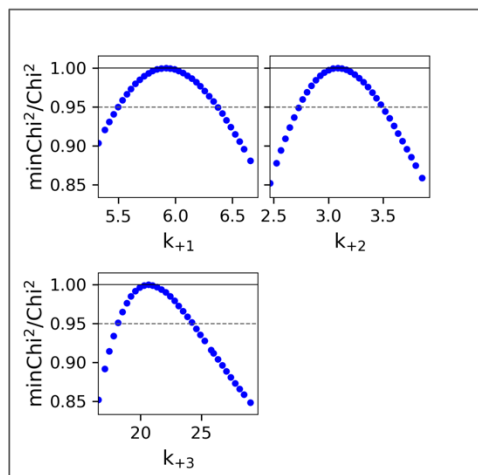**d**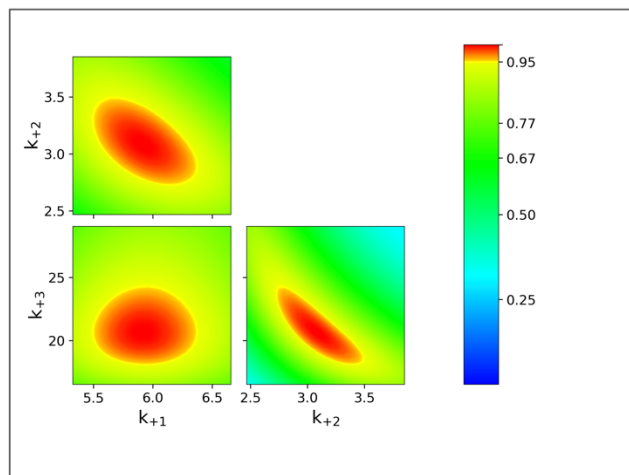

**Supplementary Figure 3. Confidence contour analysis of the global fitting of the pre-steady-state kinetic data shown in main Figure 2. a-b.** 1D and 2D FitSpace confidence contour analysis respectively, from the global fit of the stopped-flow kinetic data for the reaction of HsKYNase\_93D9 with KYN. The simulation data and the respective models are shown in Fig. 2a, b. **c-d.** 1D and 2D FitSpace confidence contour analysis respectively from the global fit of the data for the reaction of HsKYNase\_66 with KYN (Fig. 2d, e). All rate constants are expressed as  $\mu\text{M}^{-1}\text{s}^{-1}$  ( $k_1$ ) and  $\text{s}^{-1}$  ( $k_{-1}$ ,  $k_2$ ,  $k_3$ ).



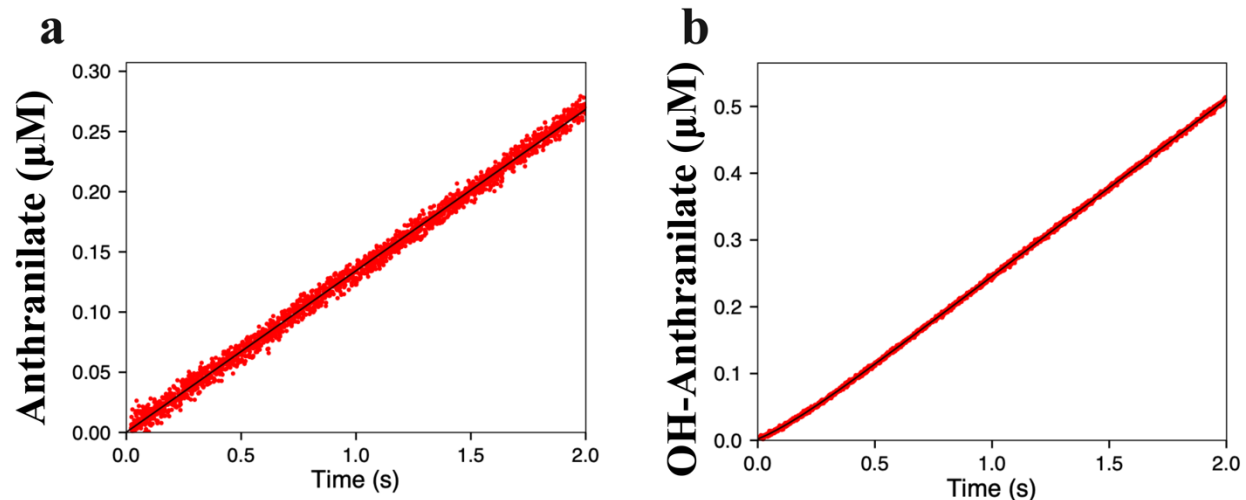

**Supplementary Figure 4. Pre-steady-state kinetic traces of HsKYNase\_93D9-H102W/N333T variant during reaction with KYN or OH-KYN. a.** Rapid formation of AA after mixing 9  $\mu\text{M}$  enzyme with 500  $\mu\text{M}$  KYN. **b.** Pre-steady-state OH-AA formation upon mixing 9  $\mu\text{M}$  HsKYNase\_93D9-H102W/N333T with 500  $\mu\text{M}$  OH-KYN. Experimental red traces represent the average of five measurements and the black line is the analytical fit to the single-exponential function as described in Methods. All reactions were performed in PBS, pH 7.4 at 37  $^{\circ}\text{C}$ .

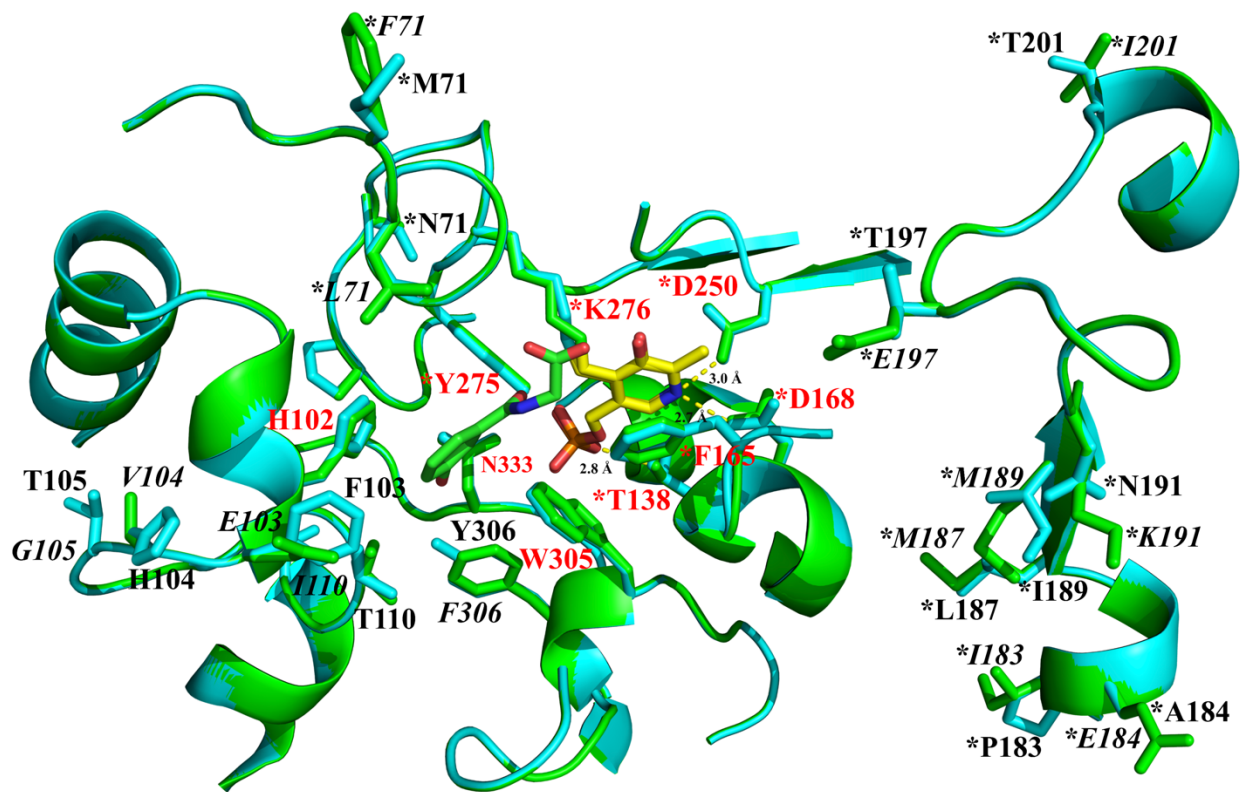

**Supplementary Figure 5. HsKYNase\_93D9 homology model.** Overlaid structures of HsKYNase (PDB entry: [3E9K](#)) and HsKYNase\_93D9 homology model focusing on the active site and mutated regions. HsKYNase and HsKYNase\_93D9 are shown in green and cyan, respectively. Side chains of mutated residues are shown in bold black font whereas in red font are key active site residues shared by both enzyme species. The asterisk denotes residues which are contributed from the “second” monomer and HsKYNase’s wild-type residues are shown in italics font.

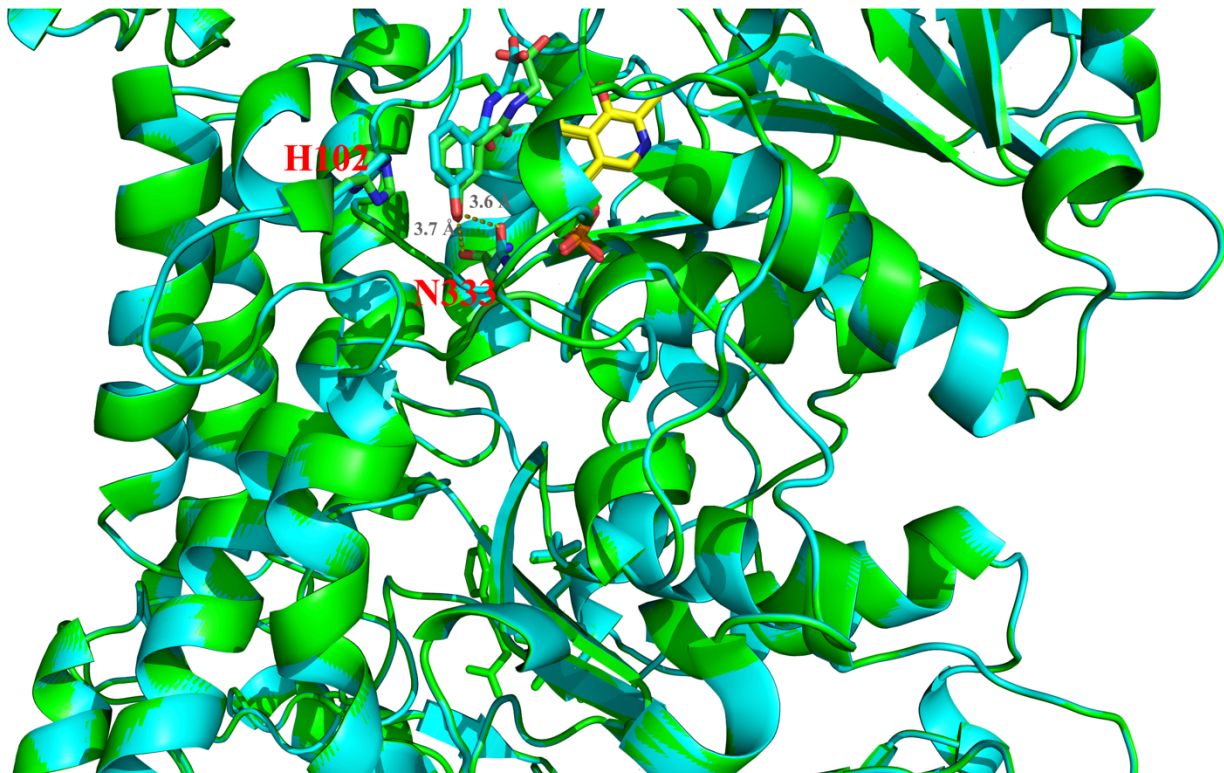

**Supplementary Figure 6. Docking of 3-hydroxy-hippuric acid inhibitor into the HsKYNase\_93D9 active site.** Overlaid active sites of HsKYNase (PDB: [3E9K](#), shown in green) in complex with 3-hydroxy-hippuric acid inhibitor and HsKYNase\_93D9 (homology model shown in cyan). The docked inhibitor into the active site of HsKYNase\_93D9 is shown as cyan sticks colored by atom sticks (nitrogen: blue, phosphate: orange, oxygen: red). The distances between the inhibitor and the N333 residue are shown as yellow dashed lines (3.7 Å and 3.6 Å for HsKYNase and HsKYNase\_93D9 respectively). The side chains of the motif H102-N333 residues are shown as sticks. The PLP is also shown as yellow sticks.

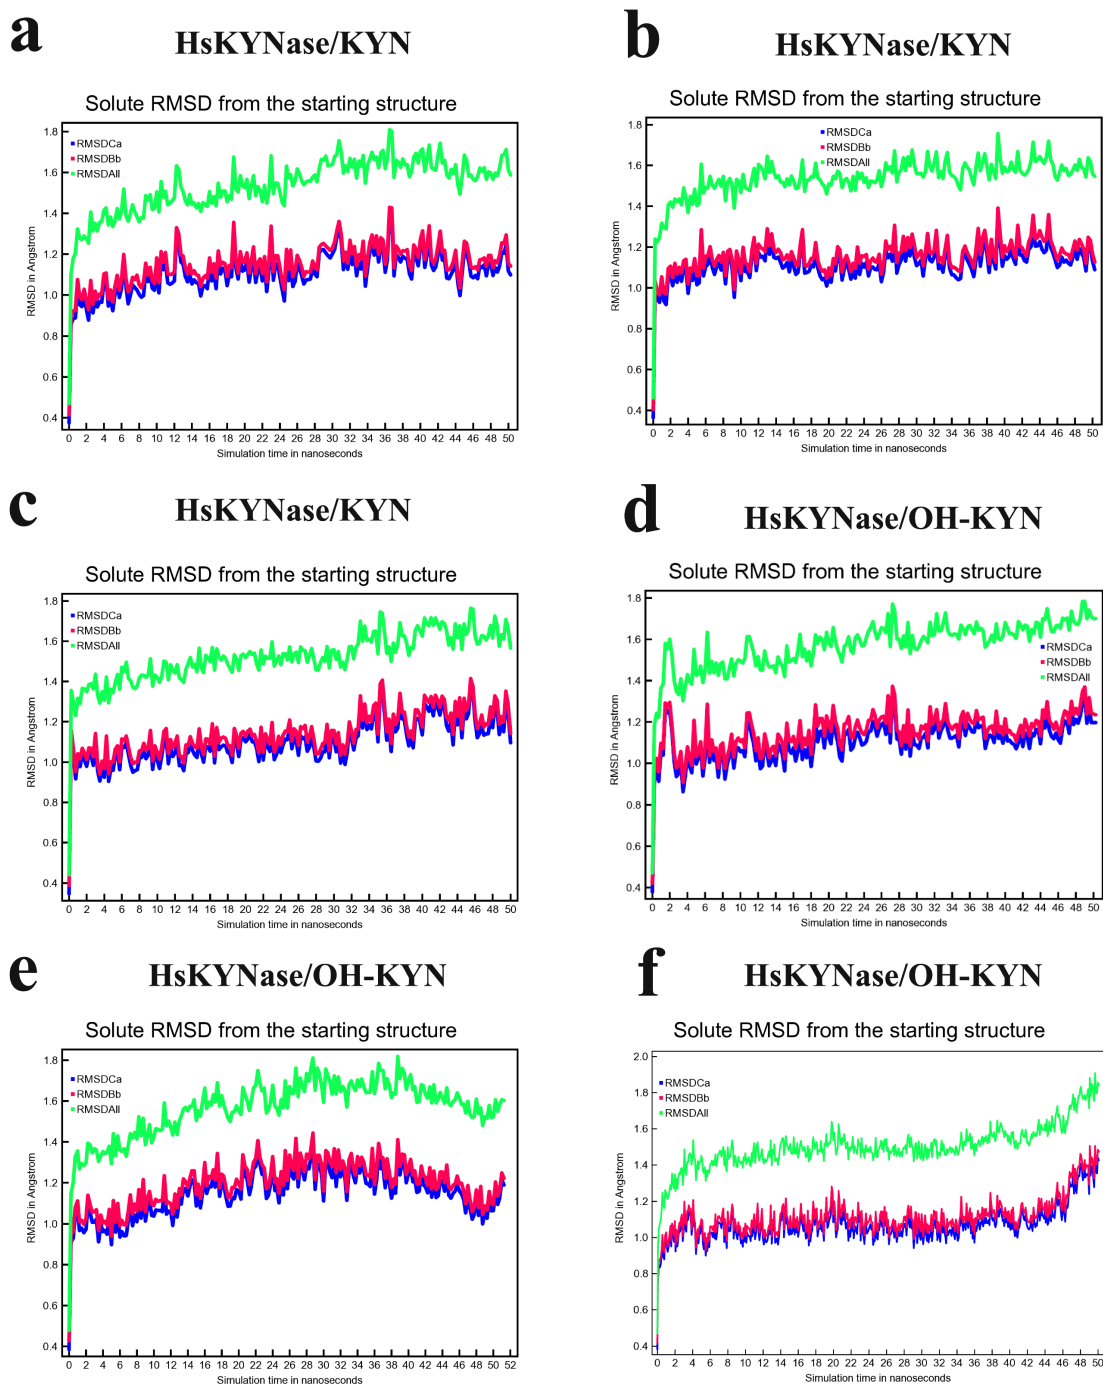

**Supplementary Figure 7. RMSD graphs showing the solute RMSD from the starting structure as a function of simulation time for HsKYNase. a-c.** Replicate runs for HsKYNase/KYN complex and **d-f.** MD simulation runs for the HsKYNase/OH-KYN complex. Each plot displays the RMSDC $\alpha$ , backbone (RMSDBb) and all-heavy atom including that from the ligand as well (RMSDAII) in blue, red and green traces respectively. The RMSD plots indicate that the simulations reach equilibrium and are stable over 50 nanoseconds. The trajectories shown in panels a and d were chosen for further analysis of the enzyme-ligand interactions and are shown in the main text.

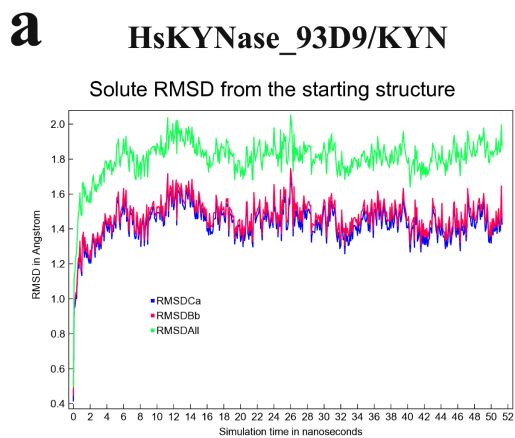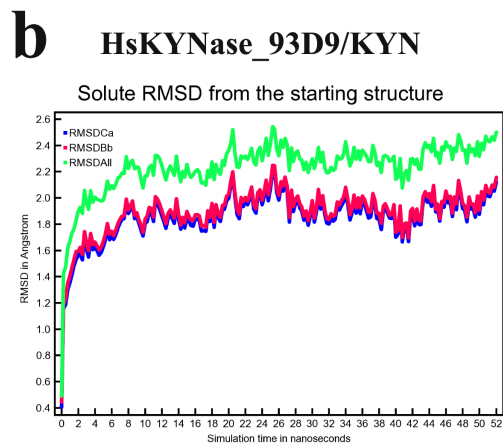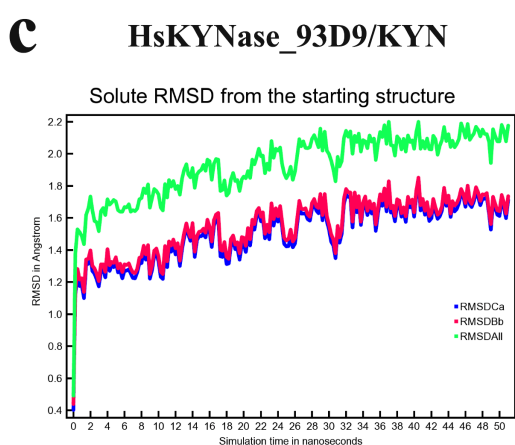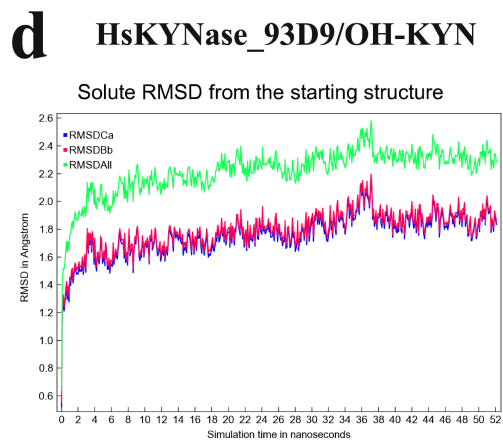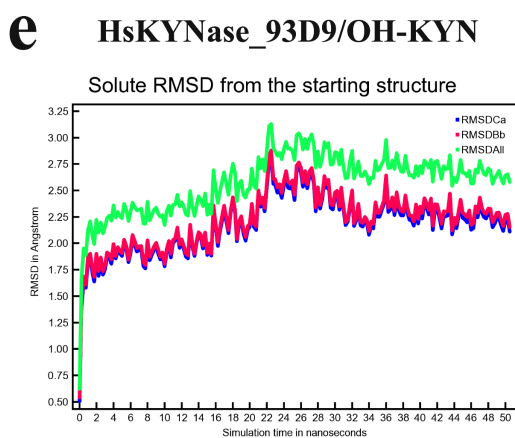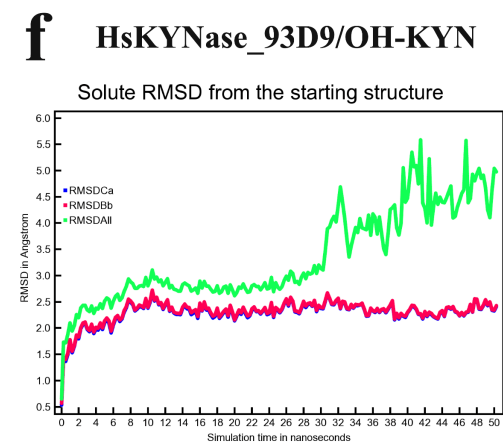

**Supplementary Figure 8. RMSD graphs showing the solute RMSD from the starting structure as a function of simulation time for HsKYNase\_93D9. a-c. Replicate runs for HsKYNase\_93D9/KYN complex and d-f. replicate runs for the HsKYNase\_93D9/OH-KYN complex. Traces are colored as in Supplementary Fig. 7 above. The trajectories shown in panels a and d were chosen for further analysis of the enzyme-ligand interactions and are shown in the main text.**

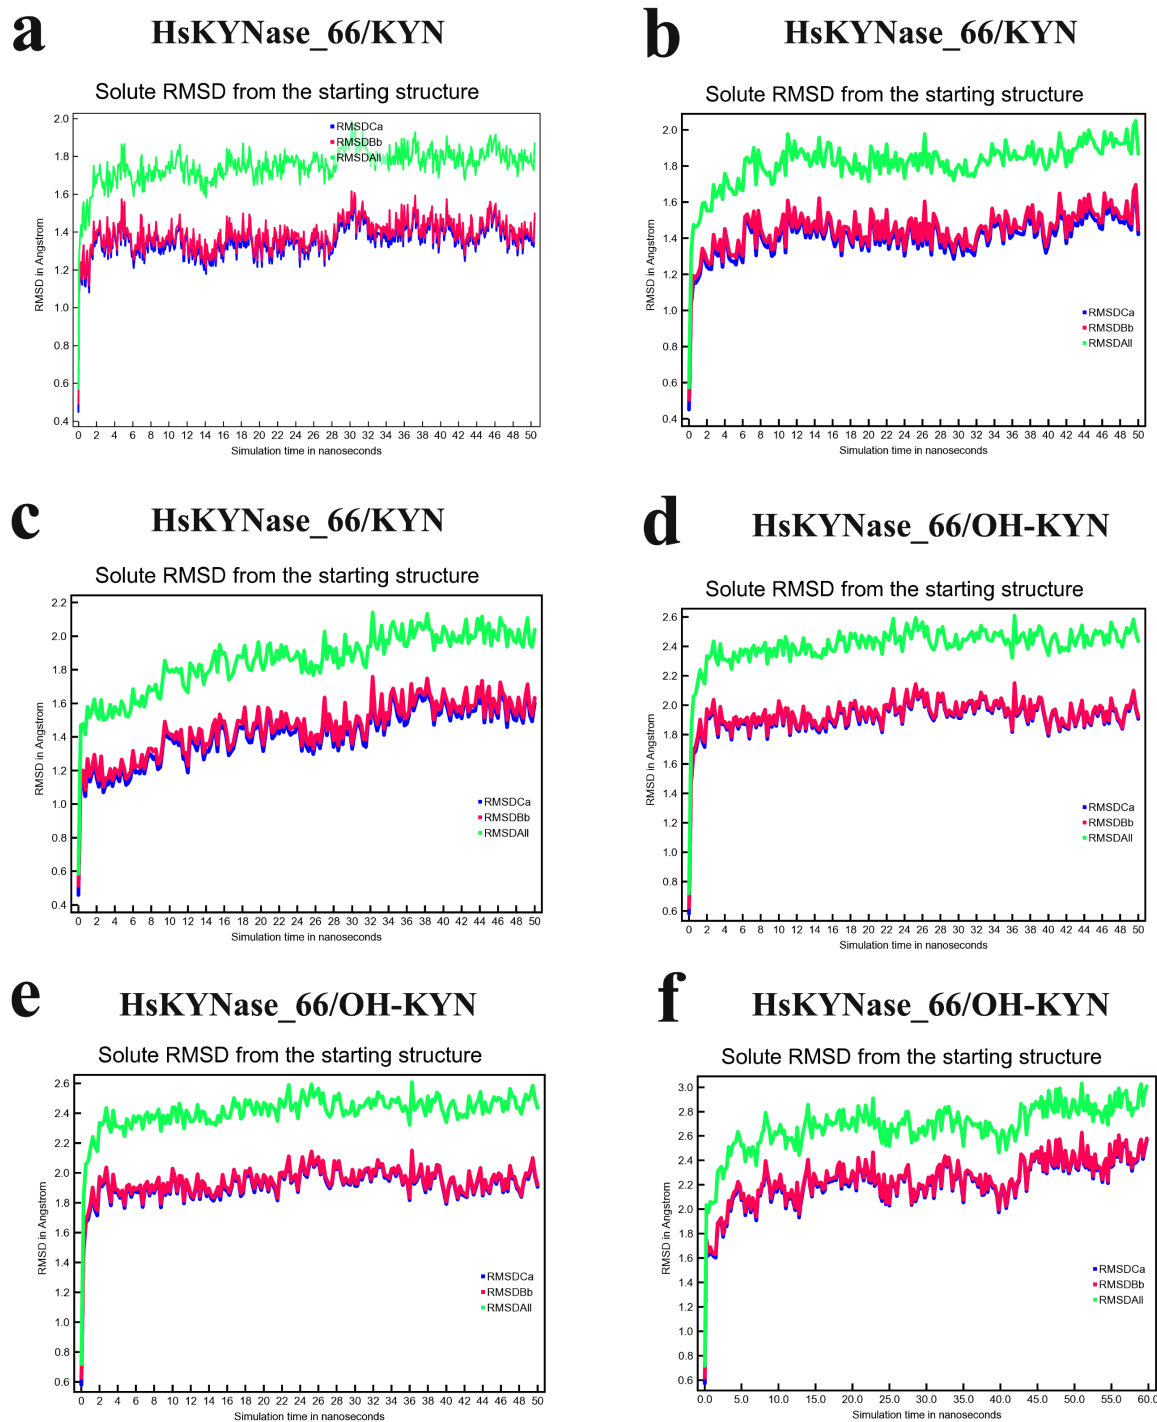

**Supplementary Figure 9. RMSD graphs showing the solute RMSD from the starting structure as a function of simulation time for HsKYNase\_66. a-c.** Replicate runs for HsKYNase\_66/KYN complex and **d-f.** replicate runs for the HsKYNase\_66/OH-KYN complex. Traces are colored as in Supplementary Fig. 7 and 8 above. The trajectories shown in panels a and d were chosen for further analysis of the enzyme-ligand interactions and are shown in the main text.



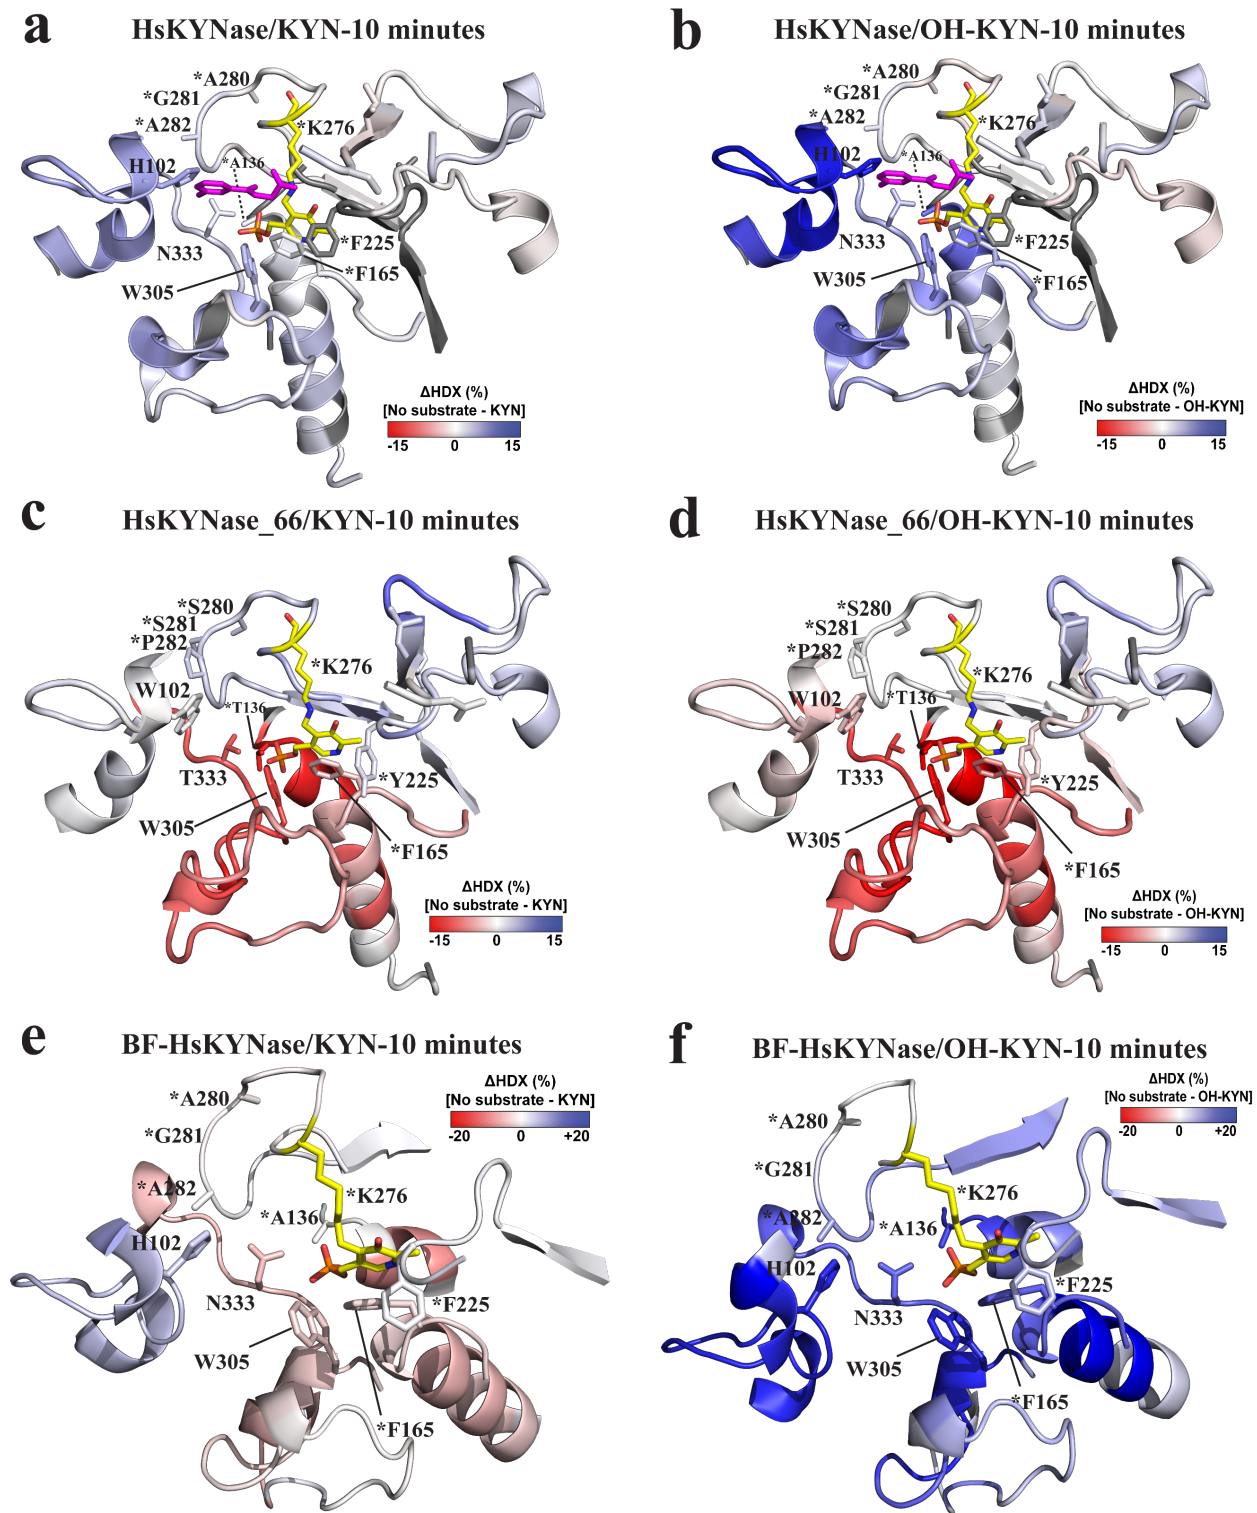

**Supplementary Figure 10. Summary of HDX-MS protein dynamics for wild-type HsKYNase, HsKYNase\_66 and BF-HsKYNase. a-b.** Zoom-in on the active site of HsKYNase (PDB: [3E9K](#)) colored by the difference in fractional D-uptake (-15 to +15%) between no substrate and with KYN or OH-KYN respectively after 10 minutes exposure to deuterium<sup>1</sup>. **c-d.** Zoom-in on the active site of HsKYNase\_66



(PDB: [7S3V](#)) during reaction for 10 minutes with KYN and OH-KYN respectively<sup>2</sup>. **e-f.** Zoom-in on the active site of BF-HsKYNase during reaction for 10 minutes with KYN and OH-KYN respectively<sup>3</sup>. Key active site- and important PLP-interacting residues at regions with significant exchange are labeled in all panels and atom sticks are color-coded (nitrogen: blue, phosphate: orange, oxygen: red). Asterisk indicates that residue is contributed by the “second” KYNase chain. HDX-MS experiments for each protein were conducted in the same conditions but independently. The data were reproduced upon permission of the respective journals cited here. HsKYNase data were reprinted with permission from Karamitros, C. S. *et al.* Conformational Dynamics Contribute to Substrate Selectivity and Catalysis in Human Kynureninase. *ACS Chem. Biol.* **15**, 3159–3166 (2020). Copyright 2020, American Chemical Society.

## Supplementary Tables

**Supplementary Table 1.** Summary of all the mutant libraries that were generated and subjected to genetic selection and 96-well plate screening in the present study.

| #  | Type of library                                    | Sites targeted and fixed/allowed mutations  | HsKYNase template           | Screening method                                                                                |
|----|----------------------------------------------------|---------------------------------------------|-----------------------------|-------------------------------------------------------------------------------------------------|
| 1  | Saturated mutagenesis (NNS)                        | T297-A301-V303                              | Wild-type HsKYNase          | <i>E. coli</i> $\Delta$ TrpE high throughput selection & 96-well plate spectrophotometric assay |
| 2  | Saturated mutagenesis (NNS)                        | A295-H296-I298-T297                         | Wild-type HsKYNase          | <i>E. coli</i> $\Delta$ TrpE high throughput selection & 96-well plate spectrophotometric assay |
| 3  | Saturated mutagenesis (NNS)                        | N127-E128-K129                              | Wild-type HsKYNase          | <i>E. coli</i> $\Delta$ TrpE high throughput selection & 96-well plate spectrophotometric assay |
| 4  | Saturated mutagenesis (NNS)                        | F71-L72-K81-M82                             | Wild-type HsKYNase          | <i>E. coli</i> $\Delta$ TrpE high throughput selection & 96-well plate spectrophotometric assay |
| 5  | Saturated mutagenesis (NNS)                        | F149-K150-K154-Y156                         | Wild-type HsKYNase          | <i>E. coli</i> $\Delta$ TrpE high throughput selection & 96-well plate spectrophotometric assay |
| 6  | Saturated mutagenesis (NNS)                        | K84-T85-Y86-E88                             | Wild-type HsKYNase          | <i>E. coli</i> $\Delta$ TrpE high throughput selection & 96-well plate spectrophotometric assay |
| 7  | Saturated mutagenesis (NNS)                        | E90-K93-V104-K106-R107                      | Wild-type HsKYNase          | <i>E. coli</i> $\Delta$ TrpE high throughput selection & 96-well plate spectrophotometric assay |
| 8  | Saturated mutagenesis (NNS)                        | V339-C340-S341-H343-E347-T353               | Wild-type HsKYNase          | <i>E. coli</i> $\Delta$ TrpE high throughput selection & 96-well plate spectrophotometric assay |
| 9  | Saturated mutagenesis (NNS)                        | I97-A98-A99-Y100                            | Wild-type HsKYNase          | <i>E. coli</i> $\Delta$ TrpE high throughput selection & 96-well plate spectrophotometric assay |
| 10 | Saturated mutagenesis (NNS)                        | E103-V104-G105                              | Wild-type HsKYNase          | <i>E. coli</i> $\Delta$ TrpE high throughput selection & 96-well plate spectrophotometric assay |
| 11 | Saturated mutagenesis (NNS)                        | G105-K106-R107-P108                         | Wild-type HsKYNase          | <i>E. coli</i> $\Delta$ TrpE high throughput selection & 96-well plate spectrophotometric assay |
| 12 | Saturated mutagenesis (NNS)                        | P108-I110-T111-S115                         | Wild-type HsKYNase          | <i>E. coli</i> $\Delta$ TrpE high throughput selection & 96-well plate spectrophotometric assay |
| 13 | Saturated mutagenesis (NNS)                        | Y100-E103-P108-I110-T111                    | Wild-type HsKYNase          | <i>E. coli</i> $\Delta$ TrpE high throughput selection & 96-well plate spectrophotometric assay |
| 14 | Saturated mutagenesis (NNS)                        | V326-I331-P334                              | Wild-type HsKYNase          | <i>E. coli</i> $\Delta$ TrpE high throughput selection & 96-well plate spectrophotometric assay |
| 15 | Saturated mutagenesis (NNS)                        | F329-R330-I331-P334                         | Wild-type HsKYNase          | <i>E. coli</i> $\Delta$ TrpE high throughput selection & 96-well plate spectrophotometric assay |
| 16 | Saturated mutagenesis (NNS)                        | M187-M189-K191                              | Wild-type HsKYNase          | <i>E. coli</i> $\Delta$ TrpE high throughput selection & 96-well plate spectrophotometric assay |
| 17 | Saturated mutagenesis (NNS)                        | E259                                        | Wild-type HsKYNase          | 96-well plate spectrophotometric assay                                                          |
| 18 | Fixed mutations and partial saturation mutagenesis | T138S-V139NDT-H142F-L143K                   | Wild-type HsKYNase          | 96-well plate spectrophotometric assay                                                          |
| 19 | Fixed mutations and partial saturation mutagenesis | Y156NNS-K157V-L160A/T-A162R/T-K163S/T-A164N | Wild-type HsKYNase          | <i>E. coli</i> $\Delta$ TrpE high throughput selection & 96-well plate spectrophotometric assay |
| 20 | Fixed mutations and pairwise mutagenesis           | F249W-A254S/T-V255A-N257A-E259P             | Wild-type HsKYNase          | 96-well plate spectrophotometric assay                                                          |
| 21 | Fixed mutations and pairwise mutagenesis           | W272G-S274G/S/T-A280G/S-A282P-G287F         | Wild-type HsKYNase          | 96-well plate spectrophotometric assay                                                          |
| 22 | DNA shuffling-1                                    | Recombination of genes                      | <i>see separate Table 4</i> | <i>E. coli</i> $\Delta$ TrpE high throughput selection & 96-well plate spectrophotometric assay |
| 23 | Saturated mutagenesis (NNS)                        | F149-K150-K154-Y156                         | HsKYNase_93                 | <i>E. coli</i> $\Delta$ TrpE high throughput selection & 96-well plate spectrophotometric assay |

|    |                                                          |                                   |                      |                                                                                                 |
|----|----------------------------------------------------------|-----------------------------------|----------------------|-------------------------------------------------------------------------------------------------|
| 24 | Saturated mutagenesis (NNS)                              | Y156-K157-L160-A162-K163          | HsKYNase_93          | <i>E. coli</i> $\Delta$ TrpE high throughput selection & 96-well plate spectrophotometric assay |
| 25 | Saturated mutagenesis (NNS)                              | L219-F220-S221-G222               | HsKYNase_93          | <i>E. coli</i> $\Delta$ TrpE high throughput selection & 96-well plate spectrophotometric assay |
| 26 | Saturated mutagenesis (NNS)                              | H230-F231-N232D-P234              | HsKYNase_93          | <i>E. coli</i> $\Delta$ TrpE high throughput selection & 96-well plate spectrophotometric assay |
| 27 | Saturated mutagenesis (NNS)                              | P234-K238-Q241                    | HsKYNase_93          | <i>E. coli</i> $\Delta$ TrpE high throughput selection & 96-well plate spectrophotometric assay |
| 28 | Saturated mutagenesis (NNS)                              | A242-K243-Y246-F249               | HsKYNase_93          | <i>E. coli</i> $\Delta$ TrpE high throughput selection & 96-well plate spectrophotometric assay |
| 29 | Saturated mutagenesis (NNS)                              | G284-I285                         | HsKYNase_93          | <i>E. coli</i> $\Delta$ TrpE high throughput selection & 96-well plate spectrophotometric assay |
| 30 | Saturated mutagenesis (NNS)                              | H224-F225                         | HsKYNase_93          | <i>E. coli</i> $\Delta$ TrpE high throughput selection & 96-well plate spectrophotometric assay |
| 31 | Saturated mutagenesis (NNS)                              | I331                              | HsKYNase_93          | 96-well plate spectrophotometric assay                                                          |
| 32 | Saturated mutagenesis (NNS)                              | S394-H395-V396-E397               | HsKYNase_93          | <i>E. coli</i> $\Delta$ TrpE high throughput selection & 96-well plate spectrophotometric assay |
| 33 | Saturated mutagenesis (NNS)                              | T404-I405-T406-F407-S408          | HsKYNase_93          | <i>E. coli</i> $\Delta$ TrpE high throughput selection & 96-well plate spectrophotometric assay |
| 34 | Saturated mutagenesis (NNS)                              | N411-D413-Q416-E419               | HsKYNase_93          | <i>E. coli</i> $\Delta$ TrpE high throughput selection & 96-well plate spectrophotometric assay |
| 35 | Saturated mutagenesis (NNS)                              | K427-N429-N431-G432-A436          | HsKYNase_93          | <i>E. coli</i> $\Delta$ TrpE high throughput selection & 96-well plate spectrophotometric assay |
| 36 | Saturated mutagenesis (NNS)                              | A99-I110-G112                     | HsKYNase_93          | <i>E. coli</i> $\Delta$ TrpE high throughput selection & 96-well plate spectrophotometric assay |
| 37 | Saturated mutagenesis (NNS)                              | K106-R107-I110-G112               | HsKYNase_93          | <i>E. coli</i> $\Delta$ TrpE high throughput selection & 96-well plate spectrophotometric assay |
| 38 | Error prone PCR (epPCR)                                  | Random incorporation of mutations | HsKYNase_93          | <i>E. coli</i> $\Delta$ TrpE high throughput selection & 96-well plate spectrophotometric assay |
| 39 | DNA shuffling-2                                          | Recombination of genes            | see separate Table 6 | <i>E. coli</i> $\Delta$ TrpE high throughput selection & 96-well plate spectrophotometric assay |
| 40 | Saturated mutagenesis (NNS)                              | E90-K93-I97                       | HsKYNase_93D9        | <i>E. coli</i> $\Delta$ TrpE high throughput selection & 96-well plate spectrophotometric assay |
| 41 | Saturated mutagenesis (NNS)                              | T111-D113-E114                    | HsKYNase_93D9        | <i>E. coli</i> $\Delta$ TrpE high throughput selection & 96-well plate spectrophotometric assay |
| 42 | Saturated mutagenesis (NNS)                              | V339-C340-E347-K350-T353          | HsKYNase_93D9        | <i>E. coli</i> $\Delta$ TrpE high throughput selection & 96-well plate spectrophotometric assay |
| 43 | Saturated mutagenesis (NNS) & pairwise                   | Y306-H308H/Y-E309-L310-S311       | HsKYNase_93D9        | <i>E. coli</i> $\Delta$ TrpE high throughput selection & 96-well plate spectrophotometric assay |
| 44 | Saturated mutagenesis (NNS & NDT)                        | C327-F329-R330-I331(NDT)          | HsKYNase_93D9        | <i>E. coli</i> $\Delta$ TrpE high throughput selection & 96-well plate spectrophotometric assay |
| 45 | Saturated mutagenesis (NNS)                              | I405-S408-N411                    | HsKYNase_93D9        | <i>E. coli</i> $\Delta$ TrpE high throughput selection & 96-well plate spectrophotometric assay |
| 46 | Pairwise based on primary sequence of bacterial MpKYNase | K315-R330                         | HsKYNase_93D9        | <i>E. coli</i> $\Delta$ TrpE high throughput selection & 96-well plate spectrophotometric assay |
| 47 | Error prone PCR (epPCR)                                  | Random incorporation of mutations | HsKYNase_93D9        | <i>E. coli</i> $\Delta$ TrpE high throughput selection & 96-well plate spectrophotometric assay |

**Supplementary Table 2.** HsKYNase variants<sub>1-27</sub> that were isolated from NNS combinatorial mutagenesis using HsKYNase as the parental species. Mutations from the most highly active variants were rationally combined yielding Combo variants<sub>1-6</sub>. Amino acid substitutions F306Y, I331C and I3331N were identified from a previous study<sup>2</sup>. KYN steady-state kinetic parameters were obtained from purified enzyme preparations in PBS, pH 7.4 at 37 °C. Key variants are shown in green bold fonts in all Supplementary Tables.

| Variant name       | Amino acid substitutions                           | $k_{cat}$ (s <sup>-1</sup> )                                                                                 | $K_M$ (μM)          | $k_{cat}/K_M$ (M <sup>-1</sup> s <sup>-1</sup> ) | Fold-HsKYNase |
|--------------------|----------------------------------------------------|--------------------------------------------------------------------------------------------------------------|---------------------|--------------------------------------------------|---------------|
| wild-type HsKYNase | no mutations                                       | 0.12±0.02                                                                                                    | 1200±120            | 100±26                                           | 1             |
| <b>HsKYNase_1</b>  | <b>F71M-L72N-K81R-M82N (consensus sequence)</b>    | <b>1.12±0.07</b>                                                                                             | <b>650±100</b>      | <b>1720±285</b>                                  | <b>17.2</b>   |
| HsKYNase_2         | F149Y-K150R-K154R                                  | 0.45±0.04                                                                                                    | 1400±230            | 320±60                                           | 3.2           |
| HsKYNase_3         | F149Y-K150N-K154T                                  | 0.70±0.07                                                                                                    | 2000±320            | 350±66                                           | 3.5           |
| HsKYNase_4         | K84R-T85N-Y86S-E88L                                | 0.57±0.05                                                                                                    | 1500±300            | 380±83                                           | 3.8           |
| HsKYNase_5         | V339F-C340P-H343R-E347L-T353G (consensus sequence) | 0.25±0.01                                                                                                    | 1000±120            | 250±32                                           | 2.5           |
| HsKYNase_6         | I97L-A98G-Y100A                                    | 0.36±0.09                                                                                                    | 1300±450            | 280±120                                          | 2.8           |
| HsKYNase_7         | I97V-A98G-A99V-Y100H                               | 0.30±0.03                                                                                                    | 1000±120            | 300±70                                           | 3             |
| <b>HsKYNase_8</b>  | <b>E103F-V104H-G105T</b>                           | <b>0.85±0.02</b>                                                                                             | <b>500±33</b>       | <b>1700±120</b>                                  | <b>17</b>     |
| HsKYNase_9         | F329Y-I331T                                        | 0.38±0.05                                                                                                    | 1800±350            | 210±50                                           | 2.1           |
| HsKYNase_10        | M187L-M189I-K191S                                  | 0.25±0.01                                                                                                    | 500±35 <sup>a</sup> | 500±40                                           | 5             |
| HsKYNase_11        | M187L-M189V-K191N                                  | 0.23±0.01                                                                                                    | 440±40 <sup>b</sup> | 520±52                                           | 5.2           |
| HsKYNase_12        | T297G-A301G                                        | 0.27±0.03                                                                                                    | 930±300             | 290±100                                          | 2.9           |
| HsKYNase_13        | T297L-A301P                                        | 0.33±0.06                                                                                                    | 1300±250            | 250±66                                           | 2.5           |
| HsKYNase_14        | A295H-H296L-T297V-I298V                            | 0.25±0.015                                                                                                   | 1200±140            | 210±27                                           | 2.1           |
| HsKYNase_15        | A295H-H296R-T297S-I298L                            | 0.10±0.025                                                                                                   | 1600±350            | 63±21                                            | 0.6           |
| HsKYNase_16        | N127R-E128P-K129S                                  | 0.20±0.02                                                                                                    | 930±230             | 215±57                                           | 2.1           |
| HsKYNase_17        | F149Y-K150R-K154T                                  | 0.67±0.06                                                                                                    | 2300±330            | 290±50                                           | 2.9           |
| HsKYNase_18        | A98G-Y100A                                         | 0.36±0.07                                                                                                    | 1300±550            | 280±130                                          | 2.8           |
| HsKYNase_19        | E103F-V104E-G105S                                  | 0.63±0.02                                                                                                    | 620±55              | 1000±94                                          | 10            |
| HsKYNase_20        | E259P (consensus sequence)                         | 0.40±0.05                                                                                                    | 800±100             | 500±88                                           | 5             |
| HsKYNase_21        | E103F-V104S-G105T                                  | <i>only sequenced (high activity on plates but lower than HsKYNase_8 from same library)</i>                  |                     |                                                  |               |
| HsKYNase_22        | A295L-H296P-T297A-I298K                            | <i>only sequenced (marginally higher activity than wild type HsKYNase on plates; similar to HsKYNase 14)</i> |                     |                                                  |               |
| HsKYNase_23        | A295H-H296V-T297D-I298F                            | <i>only sequenced (marginally higher activity than wild type HsKYNase on plates; similar to HsKYNase 14)</i> |                     |                                                  |               |
| HsKYNase_24        | A295H-H296H-T297H-I298L                            | <i>only sequenced (marginally higher activity than wild type HsKYNase on plates; similar to HsKYNase 14)</i> |                     |                                                  |               |
| HsKYNase_25        | K84A-T85M-Y86G-E88G                                | <i>only sequenced (high activity on plates but lower than HsKYNase_4 from same library)</i>                  |                     |                                                  |               |
| HsKYNase_26        | K84A-T85D-Y86R-E88G                                | <i>only sequenced (high activity on plates but lower than HsKYNase_4 from same library)</i>                  |                     |                                                  |               |
| HsKYNase_27        | K84S-T85V-Y86A-E88G                                | <i>only sequenced (high activity on plates but lower than HsKYNase_4 from same library)</i>                  |                     |                                                  |               |

|                        |                                         |                  |               |                 |           |
|------------------------|-----------------------------------------|------------------|---------------|-----------------|-----------|
| <b>Combo variant 1</b> | <b>F71M-L72N-K81R-M82N-I331N-F306Y</b>  | <b>0.69±0.05</b> | <b>430±45</b> | <b>1600±200</b> | <b>16</b> |
| Combo variant 2        | F71M-L72N-K81R-M82N-E103F-V104H-G105T   | 1±0.065          | 250±18        | 4000±390        | 40        |
| Combo variant 3        | F71M-L72N-K81R-M82N-I331C               | 0.24±0.04        | 400±30        | 600±110         | 6         |
| Combo variant 4        | F71M-L72N-K81R-M82N-I331N               | 0.63±0.05        | 400±30        | 1575±170        | 16        |
| Combo variant 5        | E103F-V104H-G105T-I97V-A98G-A99V-Y100H  | 0.70±0.04        | 550±45        | 1270±126        | 13        |
| Combo variant 6        | F71M-L72N-K81R-M82N-K84R-T85N-Y86S-E88L | 0.65±0.06        | 500±30        | 1300±143        | 13        |

<sup>a</sup>This value represents KS as the variant displayed sigmoidal kinetics with a Hill coefficient of  $n_H \sim 1.95$

<sup>b</sup>This value represents KS as the variant displayed sigmoidal kinetics with a Hill coefficient of  $n_H \sim 2.6$

**Supplementary Table 3.** Rationally designed variants\_1-15 were constructed based on phylogenetic analysis and mutational data from previous studies<sup>2</sup>. Steady-state kinetic parameters were calculated from assays performed in PBS, pH 7.4 at 37 °C. Key variants are shown in green bold fonts.

| #  | Strategy of mutagenesis               | Amino acid substitutions                   | HsKYNase template  | $k_{cat}$ ( $s^{-1}$ )                                                                                          | $K_M$ ( $\mu M$ ) | $k_{cat}/K_M$ ( $M^{-1}s^{-1}$ ) | Fold-HsKYNase |
|----|---------------------------------------|--------------------------------------------|--------------------|-----------------------------------------------------------------------------------------------------------------|-------------------|----------------------------------|---------------|
| 1  | Rationally designed variant_1         | W272G-S274G-A280S-A282P-G287F              | Wild-type HsKYNase | 0.50±0.06                                                                                                       | 1000±180          | 500±110                          | 5             |
| 2  | Rationally designed variant_2         | W272G-S274S-A280S-A282P-G287F              | Wild-type HsKYNase | 0.53±0.05                                                                                                       | 1300±250          | 400±85                           | 4             |
| 3  | Rationally designed variant_3         | W272G-S274A-A280G-A282P-G287F              | Wild-type HsKYNase | 0.38±0.032                                                                                                      | 750±170           | 500±120                          | 5             |
| 4  | Rationally designed variant_4         | W272G-S274A-A280S-A282P-G287F              | Wild-type HsKYNase | 0.25±0.016                                                                                                      | 600±120           | 420±88                           | 4.2           |
| 5  | Rationally designed variant_5         | W272G-S274T-A280S-A282P-G287F              | Wild-type HsKYNase | 0.17±0.014                                                                                                      | 850±130           | 200±35                           | 2             |
| 6  | Rationally designed variant_6         | W272G-S274G-A280G-A282P-G287F              | Wild-type HsKYNase | 0.16±0.008                                                                                                      | 480±50            | 330±38                           | 3.3           |
| 7  | Rationally designed variant_7         | N232D-Q241H                                | Wild-type HsKYNase | 0.35±0.03                                                                                                       | 1000±200          | 350±76                           | 3.5           |
| 8  | Rationally designed variant_8         | H224N-F225Y                                | Wild-type HsKYNase | Was not kinetically characterized-only 96-well plate assessment using cell lysate (~2.5X active than wild-type) |                   |                                  |               |
| 9  | Rationally designed variant_9         | F225Y                                      | Wild-type HsKYNase | Was not kinetically characterized-only 96-well plate assessment using cell lysate (~2.5X active than wild-type) |                   |                                  |               |
| 10 | Rationally designed variant_10        | E259P-W272G-S274A-A280G-A282P-G287F        | Wild-type HsKYNase | Was not kinetically characterized-only 96-well plate assessment using cell lysate (~3X active than wild-type)   |                   |                                  |               |
| 11 | Rationally designed variant_11        | E259P-W272G-S274A-A280S-A282P-G287F        | Wild-type HsKYNase | Was not kinetically characterized-only 96-well plate assessment using cell lysate (~3X active than wild-type)   |                   |                                  |               |
| 12 | <b>Rationally designed variant_12</b> | <b>E259P-W272G-S274G-A280S-A282P-G287F</b> | Wild-type HsKYNase | Was not kinetically characterized-only 96-well plate assessment using cell lysate (~3X active than wild-type)   |                   |                                  |               |
| 13 | Rationally designed variant_13        | E259P-W272G-A280G-A282P-G287F              | Wild-type HsKYNase | Was not kinetically characterized-only 96-well plate assessment using cell lysate (~3X active than wild-type)   |                   |                                  |               |
| 14 | Rationally designed variant_14        | N232D-Q241H-E259P                          | Wild-type HsKYNase | Was not kinetically characterized-only 96-well plate assessment using cell lysate (~2.5X active than wild-type) |                   |                                  |               |
| 15 | Rationally designed variant_15        | G432I-V435F-A436G-P437F                    | Wild-type HsKYNase | Insoluble protein                                                                                               |                   |                                  |               |

**Supplementary Table 4.** Genes of HsKYNase variants that were shuffled, and screening of the resulting library led to the isolation of HsKYNase\_93. Group 1 includes variants that were isolated from NNS combinatorial mutagenesis whereas group 2 includes variants whose mutations were rationally combined. B-factor variants are from<sup>3</sup>. All genes were mixed at 1:1 molar ratio prior to DNase-I treatment. Key variants are shown in green bold fonts.

**GROUP 1-Variants isolated from combinatorial saturation mutagenesis**

| <b>Variant name</b>                                        | <b>Amino acid substitutions</b>         |
|------------------------------------------------------------|-----------------------------------------|
| <b>HsKYNase_1</b>                                          | <b>F71M-L72N-K81R-M82N</b>              |
| HsKYNase_2                                                 | F149Y-K150R-K154R                       |
| HsKYNase_3                                                 | F149Y-K150N-K154T                       |
| HsKYNase_4                                                 | K84R-T85N-Y86S-E88L                     |
| HsKYNase_5                                                 | V339F-C340P-S-H343R-E347L-T353G         |
| HsKYNase_6                                                 | I97L-A98G-Y100A                         |
| HsKYNase_7                                                 | I97V-A98G-A99V-Y100H                    |
| <b>HsKYNase_8</b>                                          | <b>E103F-V104H-G105T</b>                |
| HsKYNase_9                                                 | F329Y-I331T                             |
| HsKYNase_10                                                | M187L-M189I-K191S                       |
| HsKYNase_11                                                | M187L-M189V-K191N                       |
| B-factor_1                                                 | I183P-E184A                             |
| B-factor_2                                                 | K191R-E197S-I201T                       |
| B-factor_3                                                 | K191S-E197T-I201T                       |
| B-factor_4                                                 | N375A-Y376C-K378G                       |
| B-factor_5                                                 | K380G-A382G-K384R-P386S                 |
| B-factor_6                                                 | K380G-A382G-K384R                       |
| B-factor_7                                                 | D413S-Q416T-E419L                       |
| B-factor_8                                                 | D413C-Q416T-E419L                       |
| B-factor_9                                                 | K427M-N429E-G432A-A436T                 |
|                                                            |                                         |
| <b>GROUP 2-Variants with rationally combined mutations</b> |                                         |
| <b>Combo variant_1</b>                                     | <b>F71M-L72N-K81R-M82N-I331N-F306Y</b>  |
| Combo variant_2                                            | F71M-L72N-K81R-M82N-E103F-V104H-G105T   |
| Combo variant_3                                            | F71M-L72N-K81R-M82N-I331C               |
| Combo variant_4                                            | F71M-L72N-K81R-M82N-I331N               |
| Combo variant_5                                            | E103F-V104H-G105T-I97V-A98G-A99V-Y100H  |
| Combo variant_6                                            | F71M-L72N-K81R-M82N-K84R-T85N-Y86S-E88L |
| Rationally designed variant 8                              | H224N-F225Y                             |
| Rationally designed variant 9                              | F225Y                                   |
| Rationally designed variant 10                             | E259P-W272G-S274A-A280G-A282P-G287F     |



|                                       |                                                                                           |
|---------------------------------------|-------------------------------------------------------------------------------------------|
| Rationally designed variant_11        | E259P-W272G-S274A-A280S-A282P-G287F                                                       |
| <b>Rationally designed variant_12</b> | <b>E259P-W272G-S274G-A280S-A282P-G287F</b>                                                |
| Rationally designed variant_13        | E259P-W272G-A280G-A282P-G287F                                                             |
| Rationally designed variant_14        | E259P-N232D-Q241H                                                                         |
| <b>B-factor_10</b>                    | <b>I183P-E184A-M187L-M189I-K191N-E197T-I201T</b>                                          |
| B-factor_11                           | I183P-E184A-M187L-M189I-K191S-E197T-I201T                                                 |
| B-factor_12                           | N375A-Y376C-K378G-K380G-A382G-K384R-P386S                                                 |
| B-factor_13                           | N375A-Y376C-K378G-K380G-A382G-K384G-P386G                                                 |
| B-factor_14                           | N411R-D413F-N375A-Y376C-K378G                                                             |
| B-factor_15                           | N411R-D413F-K427M-N429E-G432A-A436T                                                       |
| B-factor_16                           | N411R-D413F-Q416T-E419L                                                                   |
| B-factor_17                           | N411R-D413C-Q416T-E419L                                                                   |
| B-factor_18                           | N411R-D413S-Q416T-E419L                                                                   |
| B-factor_19                           | N375A-Y376C-K378G-K380G-A382G-K384G-P386S-N411R-D413S-Q416T-E419L-K427M-N429E-G432A-A436T |
| B-factor_20                           | N375A-Y376C-K378G-K380G-A382G-K384R-P386S-N411R-D413S-Q416T-E419L-K427M-N429E-G432A-A436T |
| B-factor_21                           | N375A-Y376C-K378G-K380G-A382G-K384G-P386S-N411R-D413L-Q416T-E419L-K427M-N429E-G432A-A436T |
| B-factor_22                           | N375A-Y376C-K378G-K380G-A382G-K384G-P386S-N411R-D413F-Q416T-E419L-K427M-N429E-G432A-A436T |
| B-factor_23                           | N375A-Y376C-K378G-K380G-A382G-K384G-P386T-N411R-D413I-Q416T-E419L-K427M-N429E-G432A-A436T |
| B-factor_24                           | N375A-Y376C-K378G-K380G-A382G-K384R-P386G-N411R-D413S-Q416T-E419L-K427M-N429E-G432A-A436T |
| B-factor_25                           | N375A-Y376C-K378G-K380G-A382G-K384G-P386G-N411R-D413F-Q416T-E419L-K427M-N429E-G432A-A436T |
| B-factor_26                           | N375A-Y376C-K378G-K380G-A382G-K384G-P386G-N411R-D413I-Q416T-E419L-K427M-N429E-G432A-A436T |

**Supplementary Table 5.** KYN steady-state-kinetic parameters of HsKYNase\_94-102 variants that were isolated from NNS combinatorial mutagenesis using HsKYNase\_93 as the parental species. HsKYNase\_93 parental protein and key variants are shown in red and green bold fonts respectively.

| Variant name                  | Amino acid substitutions                                                                                        | $k_{cat}$ (s <sup>-1</sup> ) | $K_M$ (μM)    | $k_{cat}/K_M$ (M <sup>-1</sup> s <sup>-1</sup> ) | Fold-HsKYNase |
|-------------------------------|-----------------------------------------------------------------------------------------------------------------|------------------------------|---------------|--------------------------------------------------|---------------|
| <b>HsKYNase_93 (Parental)</b> | <b>F71M-L72N-E103F-V104H-G105T-I183P-E184A-M187L-M189I-K191N-E197T-I201T-A280S-A282P-F306Y</b>                  | <b>1.5±0.1</b>               | <b>110±15</b> | <b>13600±2000</b>                                | <b>136</b>    |
| HsKYNase_94                   | F71M-L72N-E103F-V104H-G105T-F149Y-K150R-K154R-I183P-E184A-M187L-M189I-K191N-E197T-I201T-A280S-A282P-F306Y       | 1.3±0.025                    | 210±14        | 6190±430                                         | 62            |
| HsKYNase_95                   | F71M-L72N-E103F-V104H-G105T-F149Y-K150R-K154M-Y156H-I183P-E184A-M187L-M189I-K191N-E197T-I201T-A280S-A282P-F306Y | 1.25±0.12                    | 190±60        | 6580±2100                                        | 66            |
| HsKYNase_96                   | F71M-L72N-E103F-V104H-G105T-F149Y-K150H-K154M-I183P-E184A-M187L-M189I-K191N-E197T-I201T-A280S-A282P-F306Y       | 1.15±0.01                    | 170±10        | 6760±245                                         | 68            |
| HsKYNase_97                   | F71M-L72N-E103F-V104H-G105T-I183P-E184A-M187L-M189I-K191N-E197T-I201T-H230Y-N232D-P234S-A280S-A282P-F306Y       | 1±0.07                       | 130±40        | 7700±2400                                        | 77            |
| HsKYNase_98                   | F71M-L72N-E103F-V104H-G105T-I183P-E184A-M187L-M189I-K191N-E197T-I201T-A280S-A282P-F306Y-N411S-D413F-Q416S       | 1.42±0.02                    | 300±13        | 4730±220                                         | 47            |
| <b>HsKYNase_99</b>            | <b>F71M-L72N-A99G-E103F-V104H-G105T-I110T-G112T-I183P-E184A-M187L-M189I-K191N-E197T-I201T-A280S-A282P-F306Y</b> | <b>0.73±0.02</b>             | <b>65±14</b>  | <b>11230±2450</b>                                | <b>112</b>    |
| HsKYNase_100                  | F71M-L72N-A99V-E103F-V104H-G105T-I110V-G112S-I183P-E184A-M187L-M189I-K191N-E197T-I201T-A280S-A282P-F306Y        | 1.5±0.033                    | 200±17        | 7520±660                                         | 75            |
| HsKYNase_101                  | F71M-L72N-E103F-V104H-G105T-K106P-R107E-I110T-G112L-I183P-E184A-M187L-M189I-K191N-E197T-I201T-A280S-A282P-F306Y | 1.35±0.04                    | 165±16        | 8200±620                                         | 82            |
| HsKYNase_102                  | F71M-L72N-E103F-V104H-G105T-K106R-R107S-I110V-G112Q-I183P-E184A-M187L-M189I-K191N-E197T-I201T-A280S-A282P-F306Y | 1.64±0.04                    | 220±17        | 7450±600                                         | 74            |

**Supplementary Table 6.** Genes of HsKYNase variants which were shuffled, and screening of the library led to the identification of HsKYNase\_93D9. Variant HsKYNase\_99 harbors the two mutations I110T-G112T which were found in HsKYNase\_93D9. Rationally designed variants were constructed by incorporating previously identified beneficial mutations (underlined in bold)<sup>2</sup> on HsKYNase\_93.

| Gene # | Variant name                               | Amino acid substitutions                                                                                                           |
|--------|--------------------------------------------|------------------------------------------------------------------------------------------------------------------------------------|
| 1      | <b>HsKYNase_93</b>                         | <b>F71M-L72N-E103F-V104H-G105T-I183P-E184A-M187L-M189I-K191N-E197T-I201T-A280S-A282P-F306Y</b>                                     |
| 2      | HsKYNase_94                                | F71M-L72N-E103F-V104H-G105T-F149Y-K150R-K154R-I183P-E184A-M187L-M189I-K191N-E197T-I201T-A280S-A282P-F306Y                          |
| 3      | HsKYNase_95                                | F71M-L72N-E103F-V104H-G105T-F149Y-K150R-K154M-Y156H-I183P-E184A-M187L-M189I-K191N-E197T-I201T-A280S-A282P-F306Y                    |
| 4      | HsKYNase_96                                | F71M-L72N-E103F-V104H-G105T-F149Y-K150H-K154M-I183P-E184A-M187L-M189I-K191N-E197T-I201T-A280S-A282P-F306Y                          |
| 5      | HsKYNase_97                                | F71M-L72N-E103F-V104H-G105T-I183P-E184A-M187L-M189I-K191N-E197T-I201T-H230Y-N232D-P234S-A280S-A282P-F306Y                          |
| 6      | HsKYNase_98                                | F71M-L72N-E103F-V104H-G105T-I183P-E184A-M187L-M189I-K191N-E197T-I201T-A280S-A282P-F306Y-N411S-D413F-Q416S                          |
| 7      | <b>HsKYNase_99</b>                         | <b>F71M-L72N-A99G-E103F-V104H-G105T-I110T-G112T-I183P-E184A-M187L-M189I-K191N-E197T-I201T-A280S-A282P-F306Y</b>                    |
| 8      | HsKYNase_100                               | F71M-L72N-A99V-E103F-V104H-G105T-I110V-G112S-I183P-E184A-M187L-M189I-K191N-E197T-I201T-A280S-A282P-F306Y                           |
| 9      | HsKYNase_101                               | F71M-L72N-E103F-V104H-G105T-K106P-R107E-I110T-G112L-I183P-E184A-M187L-M189I-K191N-E197T-I201T-A280S-A282P-F306Y                    |
| 10     | HsKYNase_102                               | F71M-L72N-E103F-V104H-G105T-K106R-R107S-I110V-G112Q-I183P-E184A-M187L-M189I-K191N-E197T-I201T-A280S-A282P-F306Y                    |
| 11     | Rationally designed variant on HsKYNase_93 | F71M-L72N-E103F-V104H-G105T-I183P-E184A-M187L-M189I-K191N-E197T-I201T- <b>E259P</b> -A280S-A282P-F306Y                             |
| 12     | Rationally designed variant on HsKYNase_93 | F71M-L72N-E103F-V104H-G105T-I183P-E184A-M187L-M189I-K191N-E197T-I201T- <b>N232D-Q241H</b> -A280S-A282P-F306Y                       |
| 13     | Rationally designed variant on HsKYNase_93 | F71M-L72N-E103F-V104H-G105T-I183P-E184A-M187L-M189I-K191N-E197T-I201T-A280S-A282P- <b>F306W</b>                                    |
| 14     | Rationally designed variant on HsKYNase_93 | F71M-L72N-E103F-V104H-G105T-I183P-E184A-M187L-M189I-K191N-E197T-I201T- <b>F225Y</b> -A280S-A282P-F306Y                             |
| 15     | Rationally designed variant on HsKYNase_93 | F71M-L72N-E103F-V104H-G105T-I183P-E184A-M187L-M189I-K191N-E197T-I201T- <b>N232D-Q241H-E259P</b> -A280S-A282P-F306Y                 |
| 16     | Rationally designed variant on HsKYNase_93 | F71M-L72N-E103F-V104H-G105T-I183P-E184A-M187L-M189I-K191N-E197T-I201T- <b>F225Y-N232D-Q241H</b> -A280S-A282P-F306Y                 |
| 17     | Rationally designed variant on HsKYNase_93 | F71M-L72N- <b>A99G</b> -E103F-V104H-G105T- <b>I110T-G112T</b> -I183P-E184A-M187L-M189I-K191N-E197T-I201T-A280S-A282P- <b>F306W</b> |
| 18     | Rationally designed variant on HsKYNase_93 | F71M-L72N-E103F-V104H-G105T- <b>K106R-R107S-I110V-G112Q</b> -I183P-E184A-M187L-M189I-K191N-E197T-I201T-A280S-A282P- <b>F306W</b>   |

**Supplementary Table 7.** The most highly active HsKYNase variants including HsKYNase\_93D9 (shown in bold red) that were isolated from the DNA shuffling library described in Supplementary Table 6.

| Variant name         | Amino acid substitutions                                                                                                        | $k_{cat}$ (s <sup>-1</sup> ) | $K_M$ (μM)     | $k_{cat}/K_M$ (M <sup>-1</sup> s <sup>-1</sup> ) | Fold-HsKYNase |
|----------------------|---------------------------------------------------------------------------------------------------------------------------------|------------------------------|----------------|--------------------------------------------------|---------------|
| <b>HsKYNase_93D9</b> | <b>F71M-L72N-E103F-V104H-G105T-I110T-G112T-I183P-E184A-M187L-M189I-K191N-E197T-I201T-A280S-A282P-F306Y</b>                      | <b>1.45±0.07</b>             | <b>85±0.01</b> | <b>17000±2200</b>                                | <b>170</b>    |
| HsKYNase_93C3        | F71M-L72N-A99G-E103F-V104H-G105T-K106R-R107S-I110V-G112L-I183P-E184A-M187L-M189I-K191N-E197T-I201T-Q241H-E259PA280S-A282P-F306Y | 1.4±0.04                     | 150±15         | 9330±970                                         | 93            |
| HsKYNase_93F8        | F71M-L72N-A99G-E103F-V104H-G105T-I110V-G112S-I183P-E184A-M187L-M189I-K191N-E197T-I201T-A280S-A282P-F306Y                        | 1.6±0.05                     | 220±20         | 7300±700                                         | 73            |

**Supplementary Table 8.** Rate constants calculated from the global fit analysis of the reaction of HsKYNase\_93D9 with KYN (data are shown in Fig. 2a and b in the main text).

| <b>Rate constant</b>                      | <b>Lower limit<sup>a</sup></b> | <b>Upper limit<sup>b</sup></b> | <b>%Range<sup>c</sup></b> | <b>Best fit</b> |
|-------------------------------------------|--------------------------------|--------------------------------|---------------------------|-----------------|
| $k_1$ ( $\mu\text{M}^{-1}\text{s}^{-1}$ ) | 0.22                           | 0.27                           | 10                        | 0.24            |
| $k_{-1}$ ( $\text{s}^{-1}$ )              | 3.31                           | 4.83                           | 19                        | 4               |
| $k_2$ ( $\text{s}^{-1}$ )                 | 0.77                           | 0.81                           | 2.5                       | 0.79            |

<sup>a,b</sup>Lower and upper limits represent a threshold of 5% deviation from the minimal Sum Square Error (SSE) in the confidence contours. <sup>c</sup>The percentage range was calculated by dividing the mean of the range by the best fit values as follows: (upper-lower)/(2×best fit). This represents the allowable variation of each best fit value as a percentage.

**Supplementary Table 9.** Rate constants calculated from the global fit analysis of the reaction of HsKYNase\_66 with KYN (data are shown in Fig. 2d and e in the main text).

| Rate constant                             | Lower limit <sup>a</sup> | Upper limit <sup>b</sup> | %Range <sup>c</sup> | Best fit |
|-------------------------------------------|--------------------------|--------------------------|---------------------|----------|
| $k_1$ ( $\mu\text{M}^{-1}\text{s}^{-1}$ ) | 5.5                      | 6.4                      | 7.6                 | 5.9      |
| $k_2$ ( $\text{s}^{-1}$ )                 | 2.78                     | 3.28                     | 8                   | 3.1      |
| $k_3$ ( $\text{s}^{-1}$ )                 | 17.5                     | 24.8                     | 17.3                | 21       |

<sup>a,b</sup>Lower and upper limits represent a threshold of 5% deviation from the minimal Sum Square Error (SSE) in the confidence contours. <sup>c</sup>The percentage range was calculated by dividing the mean of the range by the best fit values as follows: (upper-lower)/(2×best fit). This represents the allowable variation of each best fit value as a percentage.

**Supplementary Table 10.** Steady-state kinetic properties of HsKYNase\_93D9 against KYN and OH-KYN in D<sub>2</sub>O, pD 7.4 at 37 °C.

| $k_{\text{cat}}$ ( $\text{s}^{-1}$ ) | $K_M$ ( $\mu\text{M}$ ) | $k_{\text{cat}}/K_M$ ( $\text{M}^{-1}\text{s}^{-1}$ ) |
|--------------------------------------|-------------------------|-------------------------------------------------------|
| <b>KYN</b>                           |                         |                                                       |
| 0.16±0.012                           | 250±49                  | 640±134                                               |
| <b>OH-KYN</b>                        |                         |                                                       |
| 0.135±0.007                          | 50±8                    | $(2.7\pm0.45) \times 10^3$                            |

**Supplementary Table 11.** Summary of HDX-MS experimental parameters

| Data Set                             | HsKYNase_93D9                                                |
|--------------------------------------|--------------------------------------------------------------|
| HDX reaction details                 | PBS $\pm$ substrate <sup>a</sup><br>pH <sub>read</sub> = 7.0 |
| HDX time course (min)                | 1, 10, 100 at 37°C                                           |
| HDX control samples                  | Unlabeled HsKYNase_93D9                                      |
| Back-exchange (mean)                 | ~30%                                                         |
| # of peptides                        | 132                                                          |
| Sequence coverage                    | 94%                                                          |
| Average peptide length / Redundancy  | 12.5 / 3.73                                                  |
| Replicates (biological or technical) | 3 (technical)                                                |
| Repeatability                        | 0.07 (average standard deviation)                            |
| Significant difference               | $\Delta$ HDX greater than 0.3 Da<br>p-value $\leq$ 0.01      |

<sup>a</sup>KYN and OH-KYN were 3 mM

### Supplementary References

1. Karamitros, C. S. *et al.* Conformational Dynamics Contribute to Substrate Selectivity and Catalysis in Human Kynureninase. *ACS Chem. Biol.* **15**, 3159–3166 (2020).
2. Blazeck, J. *et al.* Bypassing evolutionary dead ends and switching the rate-limiting step of a human immunotherapeutic enzyme. *Nat Catal* **5**, 952–967 (2022).
3. Karamitros, C. S. *et al.* Leveraging intrinsic flexibility to engineer enhanced enzyme catalytic activity. *Proc Natl Acad Sci U S A* **119**, e2118979119 (2022).
