# Supplementary material for: Mechanistic conformational and substrate selectivity profiles emerging in the evolution of enzymes via parallel trajectories
Source: PubMed Central journal article supplement — Nat Commun. 2024 Aug 16;15:7068. doi: 10.1038/s41467-024-51133-y (PMC11329768; doi:10.1038/s41467-024-51133-y), 2024-08-16
Supplement: 41467_2024_51133_MOESM2_ESM.pdf [file 41467_2024_51133_MOESM2_ESM.pdf]

## **Description of Additional Supplementary Files**

**File Name: Supplementary Data 1**

**Description:** HsKYNase\_93D9 peptides that were identified and analyzed by HDX-MS
